# Supplementary material for: Development and Validation of an HPLC Method for Simultaneous Quantification of Clopidogrel Bisulfate, Its Carboxylic Acid Metabolite, and Atorvastatin in Human Plasma: Application to a Pharmacokinetic Study
Source: Hindawi journal article supplement (doi:10.1155/2015/892470), 2015-01-01
Supplement: f1 [file 892470.f1.pdf]

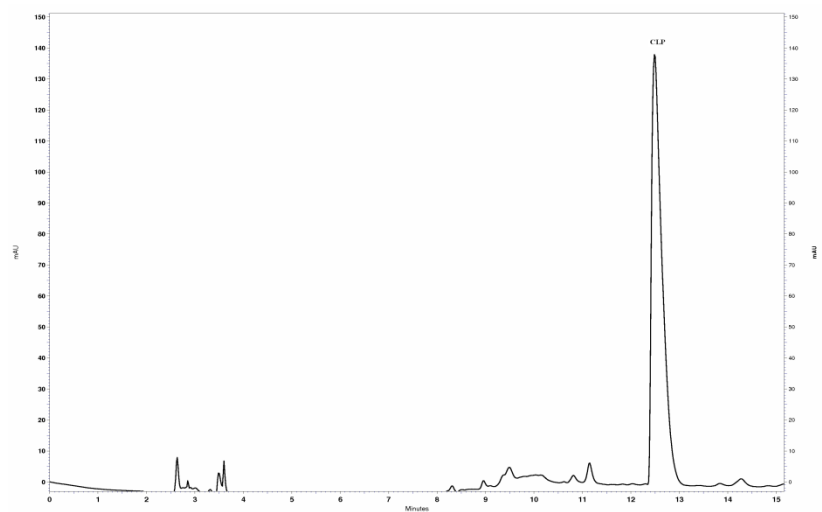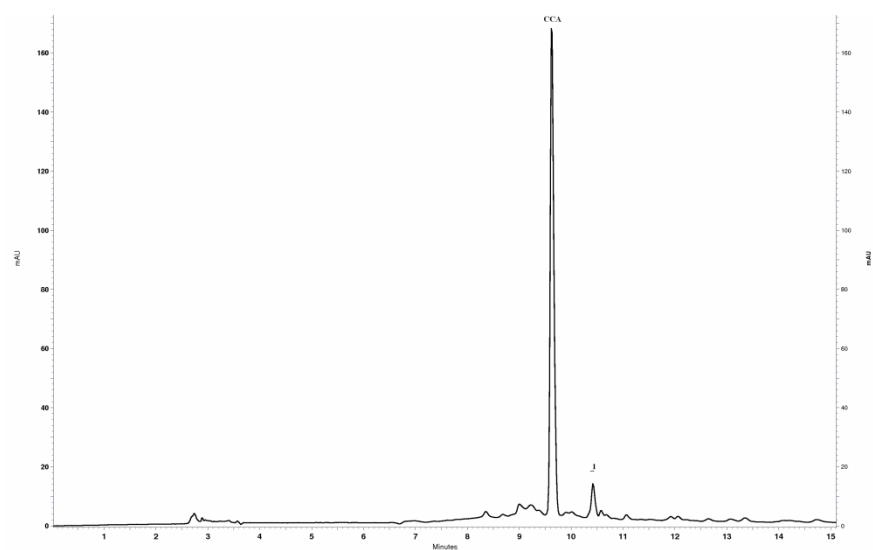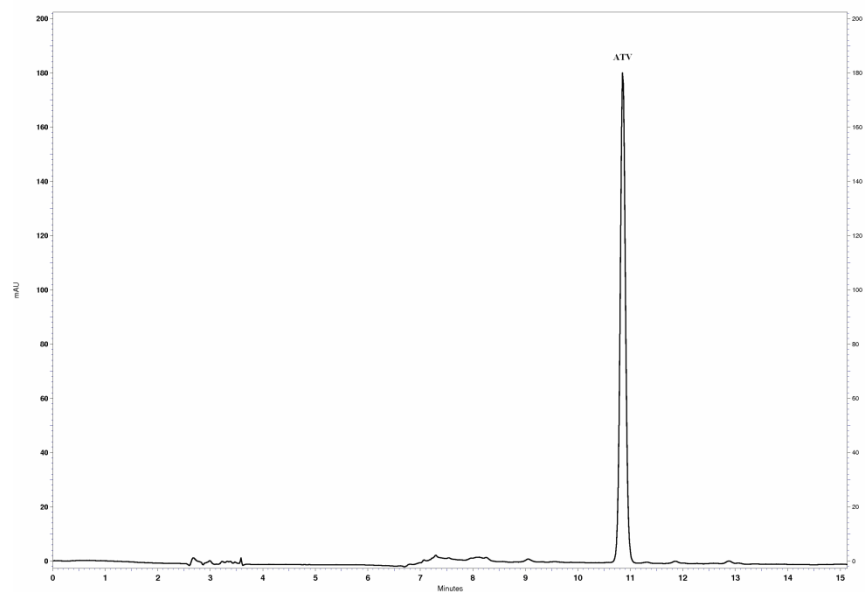

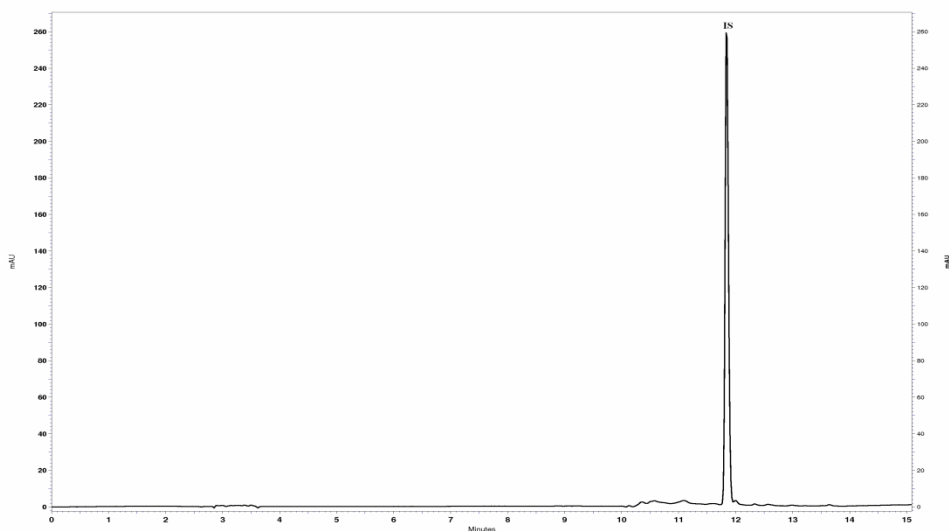

Figure S1 Chromatograms of clopidogrel bisulfate, its carboxylic acid metabolite, atorvastatin calcium and ibuprofen (IS) stock solution under the optimized chromatographic method

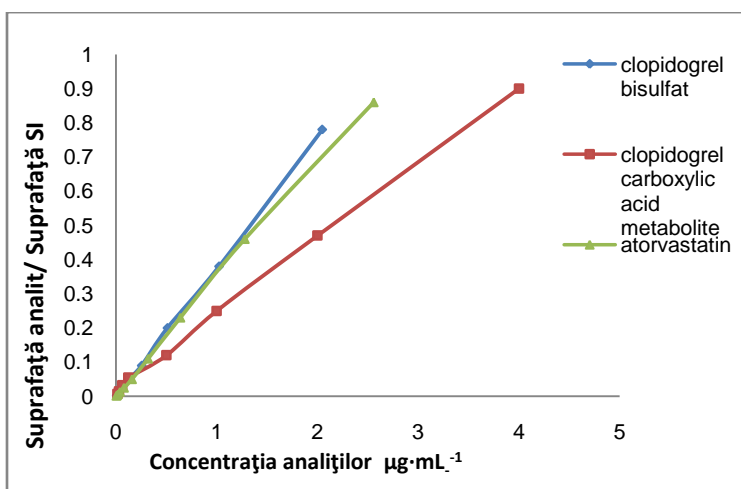

Figure S2 Calibration curves of clopidogrel bisulfate, its carboxylic acid metabolite and atorvastatin

Table S1 Results of calibration curves (n=3)

| Method                                                        | Analyte                        | Range<br>(μg/mL ) | Regression<br>ecuation | $r^2$  |
|---------------------------------------------------------------|--------------------------------|-------------------|------------------------|--------|
| HPLC<br>gradient<br>method,<br>I.S.-<br>ibuprofen<br>(2μg/mL) | Clopidogrel bisulfate          | 0.008-2           | y=0.3789<br>x+0.0004   | 0.9998 |
|                                                               | Clopidogrel carboxylic<br>acid | 0.01-4            | Y=0.2227<br>x+0.0158   | 0.9995 |
|                                                               | Atorvastatin                   | 0.005-<br>2.5     | Y=0.3404<br>x+0.0017   | 0.9994 |

### Pharmacokinetic parameters

Pharmacokinetic parameters are derived from data by mathematical calculations<sup>1</sup>.

The overall absorption process is considered to be a single first order process.

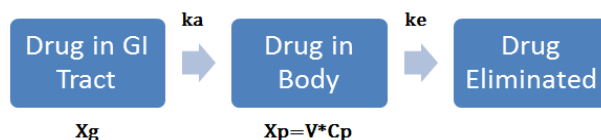

Figure X. Representing Oral Administration, One Compartment Pharmacokinetic Model

Where  $X_g$  is the amount of drug to be absorbed,  $X_p$  is the amount of drug in the body,  $k_a$  is the first order absorption rate constant,  $k_e$  is the elimination rate constant.

$$\frac{dX_g}{dt} = -k_a * X_g$$

Equation 1 Differential Equation for Amount Remaining in GI Tract

$$\frac{dX_p}{dt} = k_a * X_g - k_e * X_p$$

Equation 2 Differential Equation for Amount of Drug in the Body

The integrated equation for  $C_p$  versus time is shown in Equation 3.

$$(C_p)_t = \frac{F * Dose * k_a}{V * (k_a - k_e)} * (e^{-k_e * t} - e^{-k_a * t})$$

Equation 3 Drug Concentration after an Oral Dose

Where  $F$  is the fraction of the dose absorbed,  $V$  is the apparent volume of distribution

$\frac{F * Dose * k_a}{V * (k_a - k_e)}$  is the intercept of the plasma drug concentration versus time plot and its slope is  $\frac{-k_e}{2.303}$ .

The terminal slope is then back-extrapolated to the concentration axis. By means of the method of residuals we subtract the observed concentrations on the upswing of the curve (called absorption phase) from the extrapolated line.

Applying the method of residuals, the plot of the difference between extrapolated and observed plasma concentrations against time, on semilogarithmic, should yield a straight line which allows determination of the first-order absorption rate constant, using the equation

$$k_a = -\text{slope} * 2.303$$

---

<sup>1</sup> Mohsen A. Hedaya. *Basic Pharmacokinetics* 2<sup>nd</sup> edition. 2012. Chapter 6 Extravascular routes of drug administration, pp. 105-126

#### Equation 4 Absorption rate constant

The equation for the time of peak can be derived by setting the rate of change of  $C_p$  versus time,  $dC_p/dt$ , to zero:

$$t_{\max} = \frac{1}{(k_a - k_e)} * \ln\left(\frac{k_a}{k_e}\right)$$

#### Equation 5 Time of Peak Concentration after an oral dose

The peak plasma concentration  $(C_p)_{\max}$  occurs when time is equal to  $t_{\max}$ .

Area under the concentration-time curve from time zero to time  $t$  ( $AUC_{0-t}$ ), where  $t$  is the last measurable time, was calculated by trapezoidal rule:

Area under the concentration-time curve from time zero to time infinity ( $AUC_{0-\infty}$ ) was calculated with the formula:

$$AUC_{0-\infty} = AUC_{0-t} + \frac{C_t}{k_e}$$

Where  $C_t$  is the last measurable drug concentration.
